# Supplementary material for: Urinary Polyamines: A Pilot Study on Their Roles as Prostate Cancer Detection Biomarkers
Source: PLoS One. 2016 Sep 6;11(9):e0162217. doi: 10.1371/journal.pone.0162217 (PMC5012650; doi:10.1371/journal.pone.0162217)
Supplement: S1 Table — (* Denoted the quantifier transitions) (DOC) [file pone.0162217.s003.doc]

**Urinary Polyamines: A Pilot Study on Their Roles as Prostate Cancer Detection Biomarkers –**

**Tables S1**

Tik-Hung Tsoi1, Chi-Fai Chan1, Wai-Lun Chan2, Ka-Fung Chiu3, Wing-Tak Wong1*, Chi-Fai Ng3*, Ka-Leung Wong4*

1Department of Applied Biology and Chemical Technology, The Hong Kong Polytechnic University, Hung Hom, Hong Kong SAR.

2Department of Chemistry, National University of Singapore, 21 Lower Kent Ridge Road, Singapore.

3SHHo Urology Centre, Division of Urology, Department of Surgery, The Chinese University of Hong Kong, Shatin, N.T., Hong Kong SAR

4Department of Chemistry, Hong Kong Baptist University, Kowloon Tong, Hong Kong SAR.

**Table S1. MRM transitions, dwell time, fragmentor, collision energy and cell accelerator voltage for Put, Spd, Spm and their corresponding internal standards**

|  | **Precusor ion** | **Daughter ion** | **Dwell time (ms)** | **Fragmentor (V)** | **Collision energy (V)** | **Cell Accelerator Voltage (V)** |
| --- | --- | --- | --- | --- | --- | --- |
|  |
| **Putrescine** | 89 | 72* | 100 | 70 | 6 | 3 |
| **Putrescine - d8** | 97 | 80* | 100 | 70 | 6 | 3 |
|  |  |  |  |  |  |  |
| **Spermidine** | 146 | 112 | 100 | 90 | 10 | 3 |
|  | 146 | 72* | 100 | 90 | 15 | 3 |
| **Spermidine - d8** | 154 | 120 | 100 | 90 | 10 | 3 |
|  | 154 | 80* | 100 | 90 | 15 | 3 |
|  |  |  |  |  |  |  |
| **Spermine** | 203 | 129 | 100 | 90 | 10 | 3 |
|  | 203 | 112* | 100 | 90 | 15 | 3 |
| **Spermine - d8** | 211 | 137 | 100 | 90 | 10 | 3 |
|  | 211 | 120* | 100 | 90 | 15 | 3 |

* Denoted the quantifier transitions
